# Supplementary material for: The morphology, molecular development and ecological function of pseudonectaries on Nigella damascena (Ranunculaceae) petals
Source: PubMed Central journal article supplement (PMC7156421; doi:10.1038/s41467-020-15658-2), 2020-04-14
Supplement: 41467_2020_15658_MOESM2_ESM.pdf [file 41467_2020_15658_MOESM2_ESM.pdf]

## **SUPPLEMENTARY FIGURES AND TABLES FOR**

**The morphology, molecular development and ecological function of  
pseudonectaries on *Nigella damascena* (Ranunculaceae) petals**

Liao et al.

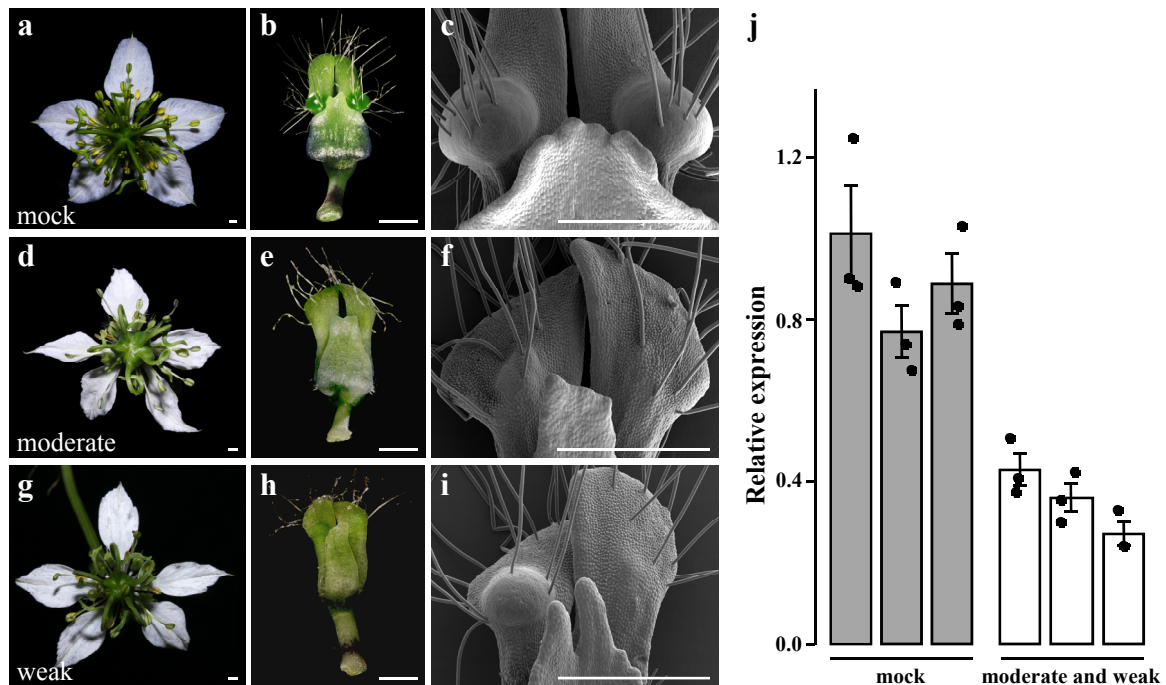

### Supplementary Figure 1. Phenotypes of VIGS-treated flowers.

The flowers and mature petals of the mock (a-c) and TRV2-*NidaYAB5*-treated flowers with moderate (d-f) and weak (g-i) phenotypic changes are shown in (a,d,g) and (b,e,h), respectively. The micromorphology of the pseudonectary regions are shown in (c,f,i). Scale bars: 1mm. Results of qRT-PCR for *NidaYAB5* in petals of mock and TRV2-*NidaYAB5*-treated flowers (j). Each treatment includes three biological replicates. Error bars indicate the standard deviation (SD) of three technical replicates of each biological replicate. The measure of the centre for the error bars is the mean value of three technical replicates of each biological replicate. Data are presented as mean values +/- SD. Source data for (j) is provided as a Source Data file.

**Supplementary Table 1** Enriched GO terms of preferably expressed genes in Part III of S9 petals.

| <b>GO terms</b> | <b>Description (Biological Process)</b>                        | <b>No. of input</b> | <b>No. of Background</b> | <b>P value</b> | <b>FDR</b> |
|-----------------|----------------------------------------------------------------|---------------------|--------------------------|----------------|------------|
| GO:0015979      | photosynthesis                                                 | 78                  | 256                      | 3.3E-55        | 9.3E-52    |
| GO:0019684      | photosynthesis, light reaction                                 | 53                  | 155                      | 1.7E-41        | 2.4E-38    |
| GO:0009768      | photosynthesis, light harvesting in photosystem I              | 25                  | 30                       | 2.2E-34        | 2.1E-31    |
| GO:0044765      | generation of precursor metabolites and energy                 | 62                  | 353                      | 1E-29          | 7.3E-27    |
| GO:0009765      | photosynthesis, light harvesting                               | 26                  | 50                       | 3.2E-27        | 1.8E-24    |
| GO:0018298      | protein-chromophore linkage                                    | 24                  | 52                       | 1.2E-23        | 5.7E-21    |
| GO:0009767      | photosynthetic electron transport chain                        | 22                  | 70                       | 1.7E-17        | 6.9E-15    |
| GO:0055114      | oxidation-reduction process                                    | 93                  | 1238                     | 5.1E-16        | 1.8E-13    |
| GO:0022900      | electron transport chain                                       | 26                  | 137                      | 1.6E-14        | 5.1E-12    |
| GO:0009416      | response to light stimulus                                     | 54                  | 657                      | 9.4E-12        | 2.7E-09    |
| GO:0009773      | photosynthetic electron transport in photosystem I             | 10                  | 19                       | 2E-11          | 5.2E-09    |
| GO:0009314      | response to radiation                                          | 54                  | 679                      | 3.2E-11        | 7.6E-09    |
| GO:0044710      | single-organism metabolic process                              | 159                 | 3215                     | 3.9E-10        | 8.7E-08    |
| GO:0009644      | response to high light intensity                               | 14                  | 89                       | 1.8E-07        | 3.6E-05    |
| GO:0009642      | response to light intensity                                    | 18                  | 148                      | 2E-07          | 3.8E-05    |
| GO:0042548      | regulation of photosynthesis, light reaction                   | 8                   | 30                       | 1.2E-06        | 0.0002     |
| GO:0043467      | regulation of generation of precursor metabolites and energy   | 8                   | 30                       | 1.2E-06        | 0.0002     |
| GO:0010109      | regulation of photosynthesis                                   | 9                   | 47                       | 5E-06          | 0.0008     |
| GO:0010114      | response to red light                                          | 9                   | 50                       | 8.6E-06        | 0.0013     |
| GO:0009628      | response to abiotic stimulus                                   | 84                  | 1796                     | 1.1E-05        | 0.0015     |
| GO:0009145      | purine nucleoside triphosphate biosynthetic process            | 8                   | 41                       | 1.4E-05        | 0.002      |
| GO:0006754      | ATP biosynthetic process                                       | 7                   | 32                       | 2.3E-05        | 0.0027     |
| GO:0015985      | energy coupled proton transport, down electrochemical gradient | 7                   | 32                       | 2.3E-05        | 0.0027     |
| GO:0015986      | ATP synthesis coupled proton transport                         | 7                   | 32                       | 2.3E-05        | 0.0027     |
| GO:0010218      | response to far red light                                      | 8                   | 44                       | 2.5E-05        | 0.0029     |
| GO:0044711      | single-organism biosynthetic process                           | 68                  | 1432                     | 3.7E-05        | 0.0041     |
| GO:0042181      | ketone biosynthetic process                                    | 8                   | 47                       | 4.1E-05        | 0.0044     |
| GO:0009142      | nucleoside triphosphate biosynthetic process                   | 8                   | 48                       | 4.8E-05        | 0.0049     |
| GO:0046148      | pigment biosynthetic process                                   | 15                  | 162                      | 5.3E-05        | 0.0052     |
| GO:0009645      | response to low light intensity stimulus                       | 5                   | 17                       | 7.5E-05        | 0.0072     |
| GO:0009206      | purine ribonucleoside triphosphate biosynthetic process        | 7                   | 40                       | 0.0001         | 0.0095     |

|            |                                                       |    |      |         |        |
|------------|-------------------------------------------------------|----|------|---------|--------|
| GO:0009735 | response to cytokinin                                 | 18 | 233  | 0.00011 | 0.0098 |
| GO:0042440 | pigment metabolic process                             | 16 | 193  | 0.00011 | 0.0098 |
| GO:0009081 | branched-chain amino acid metabolic process           | 5  | 19   | 0.00013 | 0.011  |
| GO:0010411 | xyloglucan metabolic process                          | 6  | 30   | 0.00015 | 0.012  |
| GO:0009201 | ribonucleoside triphosphate biosynthetic process      | 7  | 44   | 0.00019 | 0.015  |
| GO:0043155 | negative regulation of photosynthesis, light reaction | 5  | 21   | 0.00022 | 0.017  |
| GO:0010410 | hemicellulose metabolic process                       | 8  | 59   | 0.00022 | 0.017  |
| GO:0010205 | photoinhibition                                       | 5  | 21   | 0.00022 | 0.017  |
| GO:0015995 | chlorophyll biosynthetic process                      | 8  | 63   | 0.00034 | 0.024  |
| GO:0044550 | secondary metabolite biosynthetic process             | 14 | 173  | 0.00037 | 0.026  |
| GO:0044281 | small molecule metabolic process                      | 65 | 1482 | 0.00042 | 0.028  |
| GO:1905156 | negative regulation of photosynthesis                 | 5  | 24   | 0.00044 | 0.029  |
| GO:1901659 | glycosyl compound biosynthetic process                | 9  | 83   | 0.00049 | 0.032  |
| GO:0009694 | jasmonic acid metabolic process                       | 7  | 52   | 0.00055 | 0.035  |
| GO:0010207 | photosystem II assembly                               | 5  | 26   | 0.00065 | 0.04   |
| GO:0015994 | chlorophyll metabolic process                         | 9  | 87   | 0.0007  | 0.041  |
| GO:0010817 | regulation of hormone levels                          | 16 | 227  | 0.00069 | 0.041  |
| GO:0009637 | response to blue light                                | 8  | 71   | 0.00077 | 0.045  |

**Supplementary Table 2** Primers used in this study.

| <b>Purpose</b>  | <b>Primer name</b> | <b>Primer sequence (5'→3')</b> |
|-----------------|--------------------|--------------------------------|
| <b>VIGS</b>     |                    |                                |
| <i>NidaYAB5</i> | YAB5_V_F           | CAGGTACCGTAACTGTACGTTGTGGGC    |
| <i>NidaYAB5</i> | YAB5_V_R           | TACTCGAGGCCTTAATTCTCTGGATTTC   |
| <b>qRT-PCR</b>  |                    |                                |
| <i>NidaYAB5</i> | YAB5_qRT_F         | CACTGACCCCATTCCTCACTC          |
| <i>NidaYAB5</i> | YAB5_qRT_R         | GGCTTGTAACAACCTTTCACCTC        |
| <i>ACTIN</i>    | ACTIN_qRT_F        | CCGTTCTGCTGTGGTTGTG            |
| <i>ACTIN</i>    | ACTIN_qRT_R        | GTGTTGGACTCTGGTGATGG           |

**Supplementary Table 3** Information on VIGS experiments.

| <b>Batch</b> | <b>Plants</b>  |                 |                 | <b>Flowers</b>            |                             |                         |
|--------------|----------------|-----------------|-----------------|---------------------------|-----------------------------|-------------------------|
|              | <b>Treated</b> | <b>Survived</b> | <b>Recorded</b> | <b>Strong<sup>a</sup></b> | <b>Moderate<sup>b</sup></b> | <b>Weak<sup>c</sup></b> |
| 1            | 80             | 32              | 5               | 4                         | 10                          | 2                       |
| 2            | 104            | 40              | 40              | 5                         | 16                          | 0                       |
| 3            | 96             | 76              | 76              | 69                        | 106                         | 14                      |
| Total        | 280            | 148             | 121             | 78                        | 132                         | 16                      |

<sup>a</sup>Strong: No pseudonectaries are formed on any of the petals in a flower.

<sup>b</sup>Moderate: More than 50% pseudonectaries cannot be formed or show obvious defects.

<sup>c</sup>Weak: More than 50% pseudonectaries show no phenotypic changes.
